# Supplementary material for: Meaning-making behavior in a small-brained hominin, Homo naledi, from the late Pleistocene: contexts and evolutionary implications
Source: eLife. 2025 Sep 4;12:RP89125. doi: 10.7554/eLife.89125 (PMC12410969; doi:10.7554/eLife.89125)
Supplement: Figure 1—source data 1. [file elife-89125-fig1-data1.xlsx]

## Sheet: smaller symbolic table
site	lat	long	group	type	Max.age	Min.age	Midrange	associated species	references
Bruniquel	44.0667	1.68333	non-functional cave use	cave	-0.176	-0.176	-0.176	Neandertals	Jaubert et al 2016
Wonderwerk	27.845	23.5539	non-functional cave use	cave	n/a	n/a	-0.18	unknown archaic	Chazan and Horowitz 2009
Cueva de Ardales	36.8728	-4.82901	non-functional cave use	cave	n/a	n/a	-0.66	Neandertals	Herrerías et al. 2003
Lingjing	34.0691	113.68	engraved objects	engraved bone	-0.125	-0.105	-0.115	archaic Homo	Li et al 2019
Kozarnika	43.6833	22.5167	engraved objects	engraved bone	-1.6	-1.4	-1.5	n/a	Guadelli, A and Guadelli, J.-L. 2004.
Trinil	-7.36667	111.35	engraved objects	engraved shell	-0.64	-0.38	-0.51	Homo erectus	Joordens et al. 2014
Bilzingsleben	51.2833	11.0667	engraved objects	engraved bone	-0.37	-0.23	-0.3	Homo erectus	Mania and Mania 1988
Diepkloof Rock Shelter	-32.3667	18.45	engraved objects	engraved eggshell	-0.119	-0.099	-0.109	n/a	Texier et al 2013
Krapina	46.1656	15.8643	engraved objects	engraved bone	-0.13	-0.13	-0.13	Neandertals	Frayer et al. 2006
Qafzeh	32.6833	35.3	engraved objects	engraved stone	-0.118	-0.075	-0.0965	Homo sapiens	Hovers et al. 1997
Sainte-Anne	45.0667	3.85	engraved objects	engraved	-0.21	-0.17	-0.19	n/a	Raynal and Seguy 1986
Oldisleben	51.3333	11.1833	engraved objects	engraved bone	-0.13	-0.08	-0.105	n/a	Bendarik 2006
Sima de los Huesos	42.35	-3.5	mortuary behavior	mortuary	-0.6	-0.4	-0.5	Neandertals	Bischoff et al. 2003
Rising Star Cave	-26	27.75	mortuary behavior	mortuary	-0.335	-0.241	-0.29	Homo naledi	Berger et al 2022
Skhul	32.7286	35.0467	mortuary behavior	mortuary	-0.13	-0.1	-0.115	Homo sapiens	Ronen 1976
Tabun	32.6705	34.9655	mortuary behavior	mortuary	-0.12	-0.12	-0.12	Neandertals	Pettitt, P. B. (2002)
Qafzeh	32.6833	35.3	mortuary behavior	mortuary	-0.13	-0.08	-0.105	Homo sapiens	Vandermeersch and Bar-Yosef 2019
Panga ya Saidi	-3.67861	39.7358	mortuary behavior	mortuary	-0.082	-0.074	-0.078	Homo sapiens	Martinón-Torres et al. 2021
Berekhat Ram	33	35.7333	non-utilitarian objects	art	-0.47	-0.233	-0.35	n/a	d'Errico and Nowell 2000
Makapansgat	-24.1408	29.2008	non-utilitarian objects	art	n/a	n/a	-3	australopithecus	Bednarik 1998
Tan-Tan	28.4333	-11.1	non-utilitarian objects	art	-0.5	-0.3	-0.4	n/a	Bednairk 2003
Krapina	46.1656	15.8643	non-utilitarian objects	?	-0.13	-0.08	-0.13	Neandertals	Radovčić et al 2016
Gadeb 8e	7.08333	39.3333	ochre use	ochre	-1.45	-0.75	-1.1	n/a	Clark and Kurashina 1979
Bizat Ruhama	31.4994	34.6978	ochre use	ochre	-1.96	-0.78	-1.37	n/a	Ronen et al. (1998)
Kathu Pan 1b	-27.75	23.05	ochre use	ochre	-0.417	-0.417	-0.417	n/a	Watts et al. 2016
Hunsgi	16.4575	76.5239	ochre use	ochre	-1.5	-0.3	-0.9	n/a	Watts et al 2015
Maastricht-Belvedere C	50.8667	5.66667	ochre use	ochre	-0.27	-0.2	-0.235	Neandertals	Roebroeks et al 2012
GnJh-15	0.616667	35.9167	ochre use	ochre	-0.285	-0.285	-0.285	n/a	Denio and Mcbrearty 2003
Biddenham	52.1415	-0.50982	ornamentation	ornamentation	-0.3	-0.3	-0.3	n/a	Bednarik 2005
Contrebandiers Cave	33.9229	-6.96344	ornamentation	ornamentation	-0.115	-0.11	-0.1125	n/a	d'Errico et al 2009
Krapina	46.1656	15.8643	ornamentation	ornamentation	-0.13	-0.13	-0.13	Neandertals	Radovcic et al. 2015
Border Cave	-27.0249	31.9889	ochre use	ochre	na	na	0.2	Homo sapiens	Wadley et al. 2020
